# Supplementary material
Source: PubMed Central journal article supplement (PMC11416869)

**Figure S1**

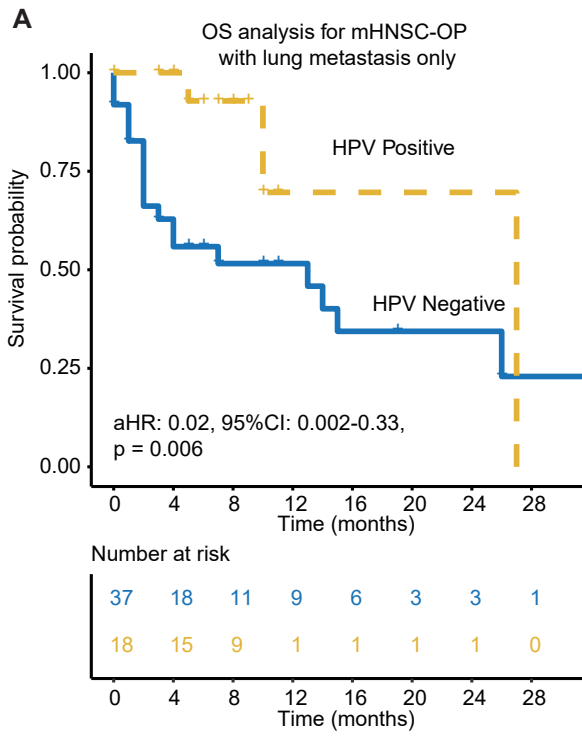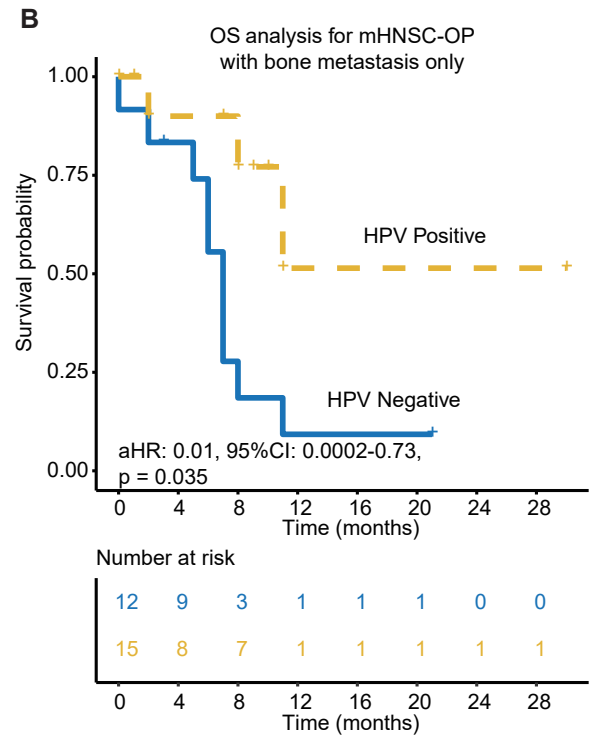

Supplement: NIHMS2021393-supplement-Supp_2.pdf [file NIHMS2021393-supplement-Supp_2.pdf]
